# Supplementary figures and images for: Correcting ligands, metabolites, and pathways
Source: Springer Nature journal article supplement (doi:10.1186/1471-2105-7-517), 2006-11-28

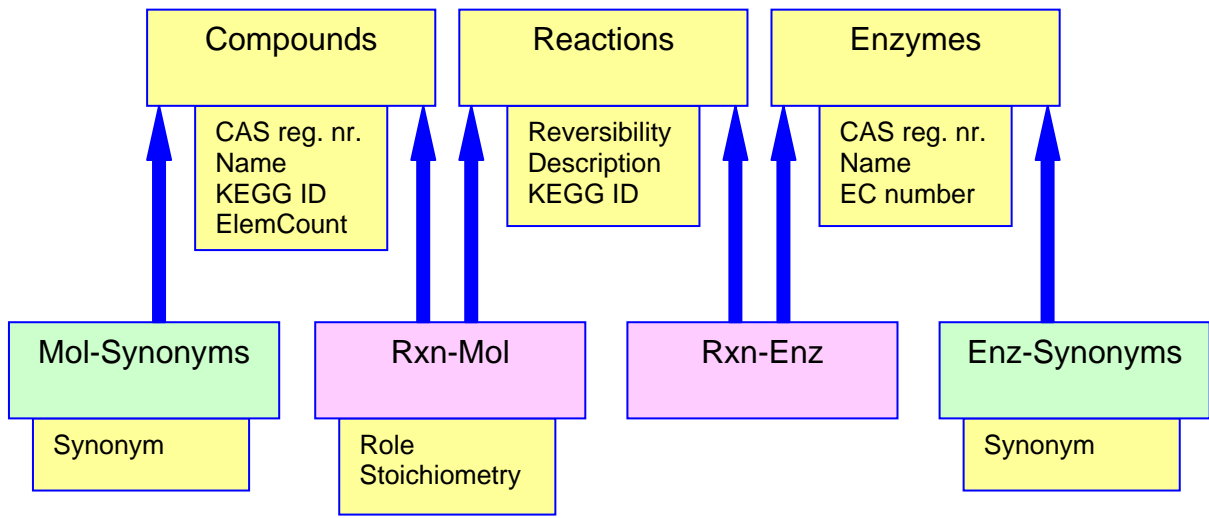

Supplement: 12859_2006_1256_MOESM1_ESM.pdf [file 12859_2006_1256_MOESM1_ESM.pdf]
